# Supplementary material for: Direct laser patterning of organic semiconductors for high performance OFET-based gas sensors
Source: Royal Society of Chemistry journal article supplement (doi:10.1039/d3tc00891f), 2023-01-01
Supplement: d3tc00891f1.pdf [file d3tc00891f1.pdf]

## **Direct laser patterning of organic semiconductors for high performance**

### **OFET-based gas sensors**

Li Chen,<sup>[a]</sup> Yuzhou Hu,<sup>[b]</sup> Huaxi Huang,<sup>[a]</sup> Chao Liu,<sup>[b]</sup> Di Wu,<sup>\* [a]</sup> Jianlong Xia<sup>\*[a]</sup>

[a] Prof. J. Xia, Assoc. Prof. D. Wu, L. Chen, H. X. Huang

School of Chemistry, Chemical Engineering and Life Science, Wuhan University of Technology,  
No. 122 Luoshi Road, Wuhan 430070, China; State Key Laboratory of Advanced Technology  
for Materials Synthesis and Processing, Center of Smart Materials and Devices, Wuhan  
University of Technology, No. 122 Luoshi Road, Wuhan 430070, China.

E-mail: D. Wu. ([chemwd@whut.edu.cn](mailto:chemwd@whut.edu.cn)); J. Xia. ([jlxia@whut.edu.cn](mailto:jlxia@whut.edu.cn))

[b] Prof. C. Liu, Y. Z. Hu

State Key Laboratory of Silicate Materials for Architectures, Wuhan University of Technology,  
122 Luoshi Road, Hongshan, Wuhan 430070, China.

|                                                                                                                   |            |
|-------------------------------------------------------------------------------------------------------------------|------------|
| <b>Table of contents</b> .....                                                                                    | <b>S2</b>  |
| <b>Fig. S1. Optical microscope images of pristine films.</b> .....                                                | <b>S3</b>  |
| <b>Fig. S2. Schematic diagram of femtosecond micro-fabrication system.</b> .....                                  | <b>S4</b>  |
| <b>Fig. S3. Optical microscope and AFM images of laser-processed PDPP-TT film.</b> .....                          | <b>S5</b>  |
| <b>Fig. S4. Schematic diagram of fs laser ablation process.</b> .....                                             | <b>S6</b>  |
| <b>Fig. S5. Surface morphology analysis with AFM.</b> .....                                                       | <b>S7</b>  |
| <b>Fig. S6. Chemical structures and optical images of N2200 and TIPS-Pentacene.</b> .....                         | <b>S8</b>  |
| <b>Fig. S7. AFM images of N2200 and TIPS-Pentacene films.</b> .....                                               | <b>S9</b>  |
| <b>Fig. S8. Output characterizations of OFETs</b> .....                                                           | <b>S10</b> |
| <b>Supplementary Note 1. The mobility calculation for OFET device with pristine and patterned OSC film.</b> ..... | <b>S11</b> |
| <b>Fig. S9. Transfer and output curves for N2200 and TIPS-Pentacene OFETs.</b> .....                              | <b>S12</b> |
| <b>Table S1. OFET parameters for N2200 and TIPS-Pentacene OFETs.</b> .....                                        | <b>S13</b> |
| <b>Fig. S10. Square root of drain current versus gate voltage for OFETs.</b> .....                                | <b>S14</b> |
| <b>Fig. S11. Mobility variations at indicated NH<sub>3</sub> concentrations.</b> .....                            | <b>S15</b> |
| <b>Fig. S12. Threshold voltage variations at indicated NH<sub>3</sub> concentrations.</b> .....                   | <b>S16</b> |
| <b>Fig. S13. Response and recovery rates for OFET gas sensors.</b> .....                                          | <b>S17</b> |
| <b>Fig. S14. The humidity stability tests of porous OFET gas sensors.</b> .....                                   | <b>S18</b> |
| <b>Fig. S15. The investigation of sensing selectivity of various OFET devices.</b> .....                          | <b>S19</b> |

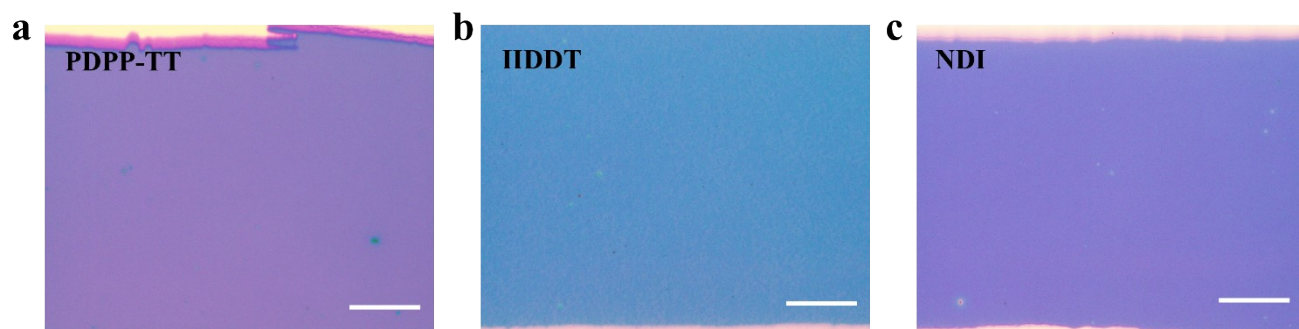

**Fig. S1.** Optical microscope (OM) images of pristine (a) PDPP-TT, (b) IIDDT and (c) NDI semiconductor films. The scale bar is 10  $\mu\text{m}$ .

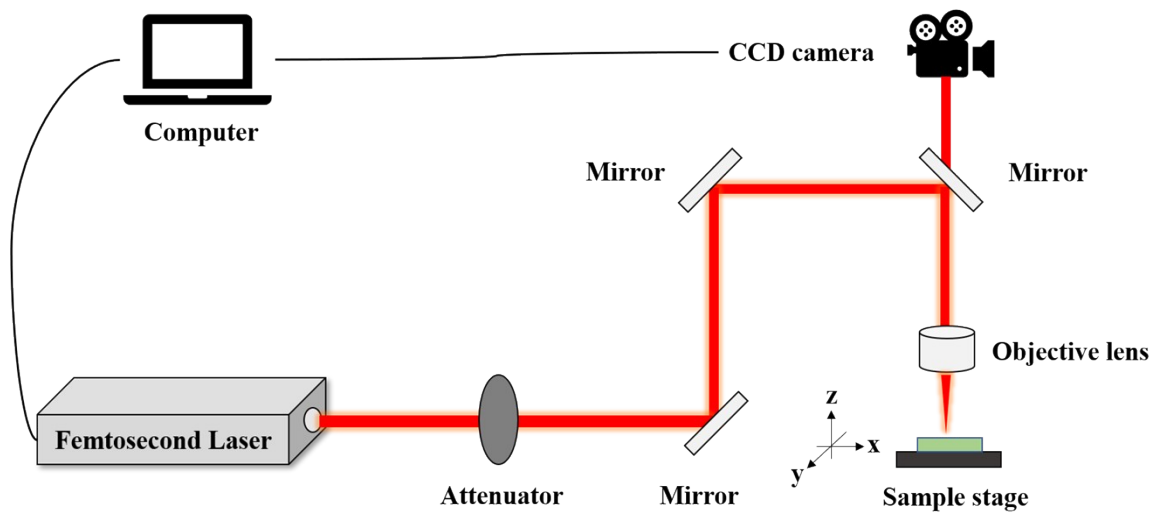

**Fig. S2.** Schematic diagram of femtosecond micro-fabrication system.

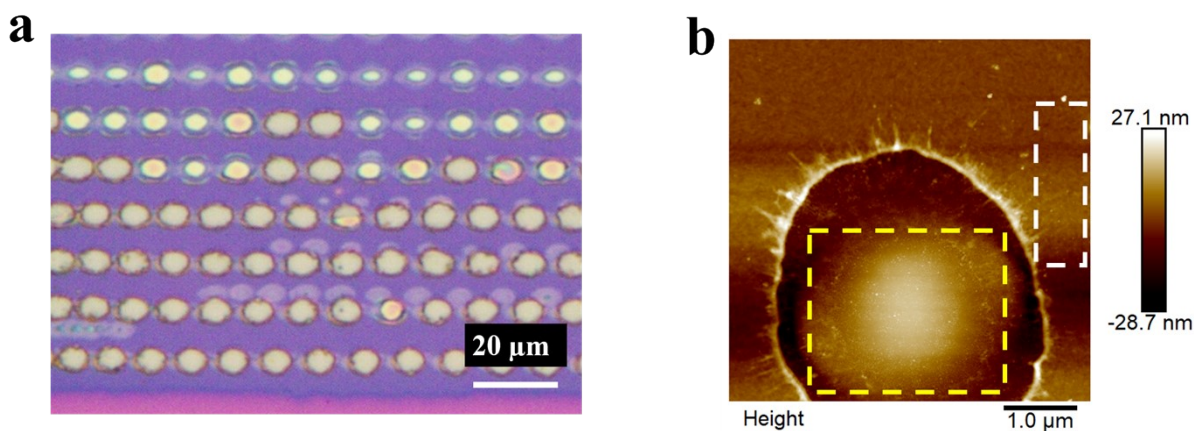

**Fig. S3.** (a) Optical microscope (OM) image of laser-processed PDPP-TT thin film. The laser beam was focused on the surface of OSC film and the underneath SiO<sub>2</sub> dielectric was obviously damaged. (b) The AFM image of pore pattern. The laser beam with high energy density has triggered the melting and reshaping of SiO<sub>2</sub> dielectric layer, resulting in obvious bulge within the pore pattern (The yellow dashed rectangle region). And this side effect can also affect the morphology of OSC covered region (As shown in white dashed rectangle area).

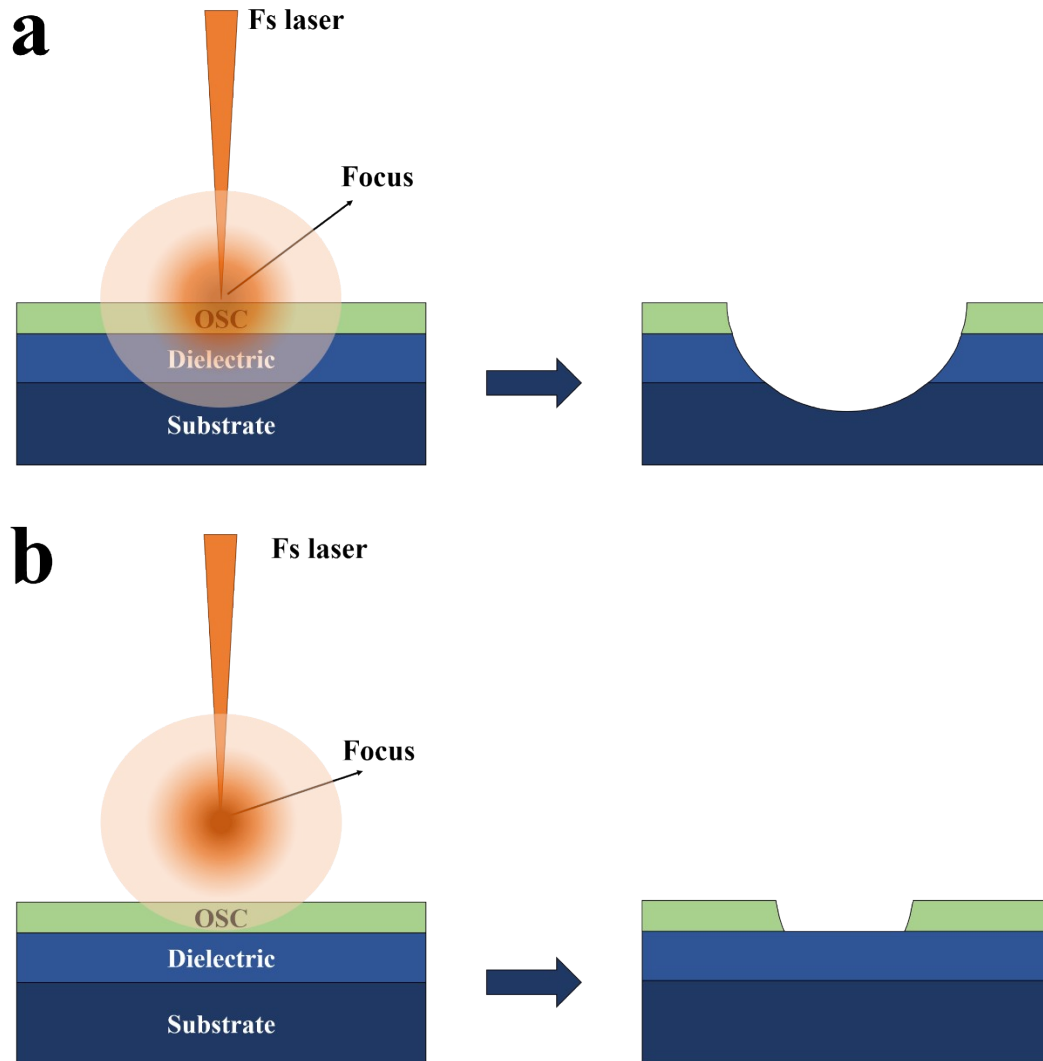

**Fig. S4.** Schematic diagram of fs laser ablation process. (a) Fs laser fabrication with the focus on OSC surface. (b) Defocusing fs laser fabrication process.

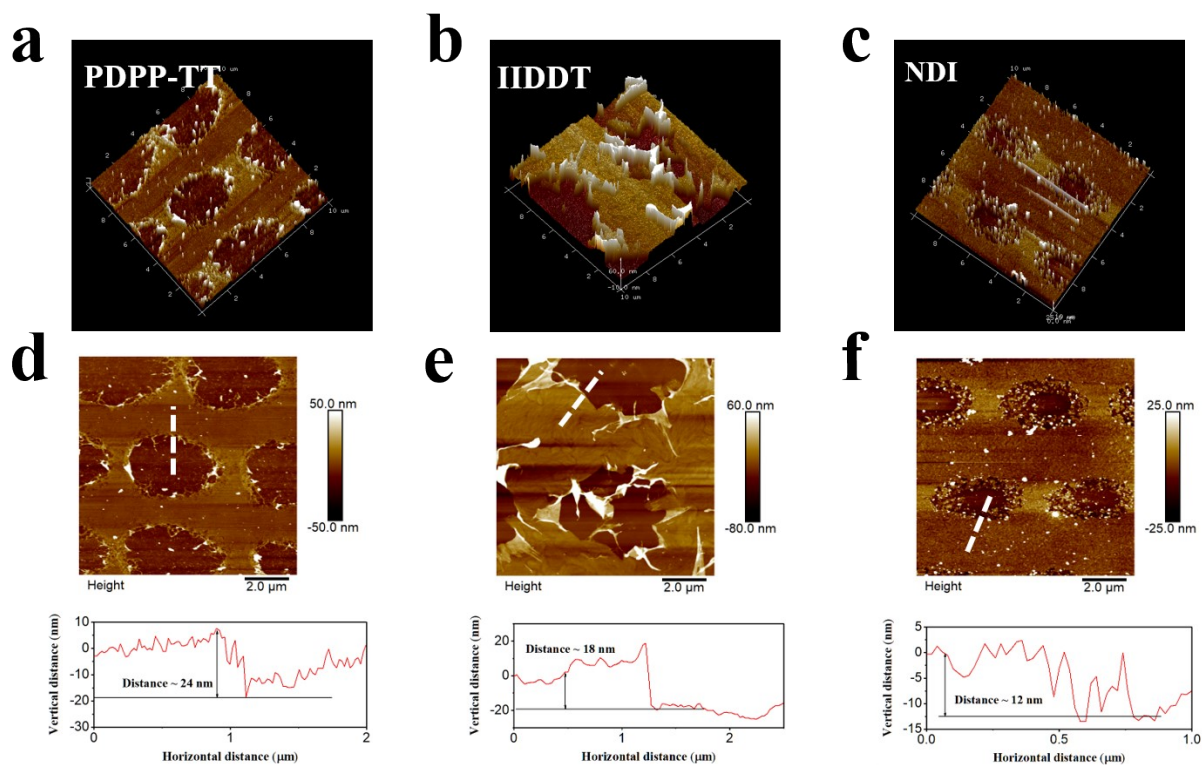

**Fig. S5.** Surface morphology analysis. (a-c) 3D AFM images of patterned films for (a) PDPP-TT, (b) IIDDT and (c) NDI materials. (d-f) AFM image and height profile for selective line of (d) PDPP-TT, (e) IIDDT and (f) NDI based patterned OSC films.

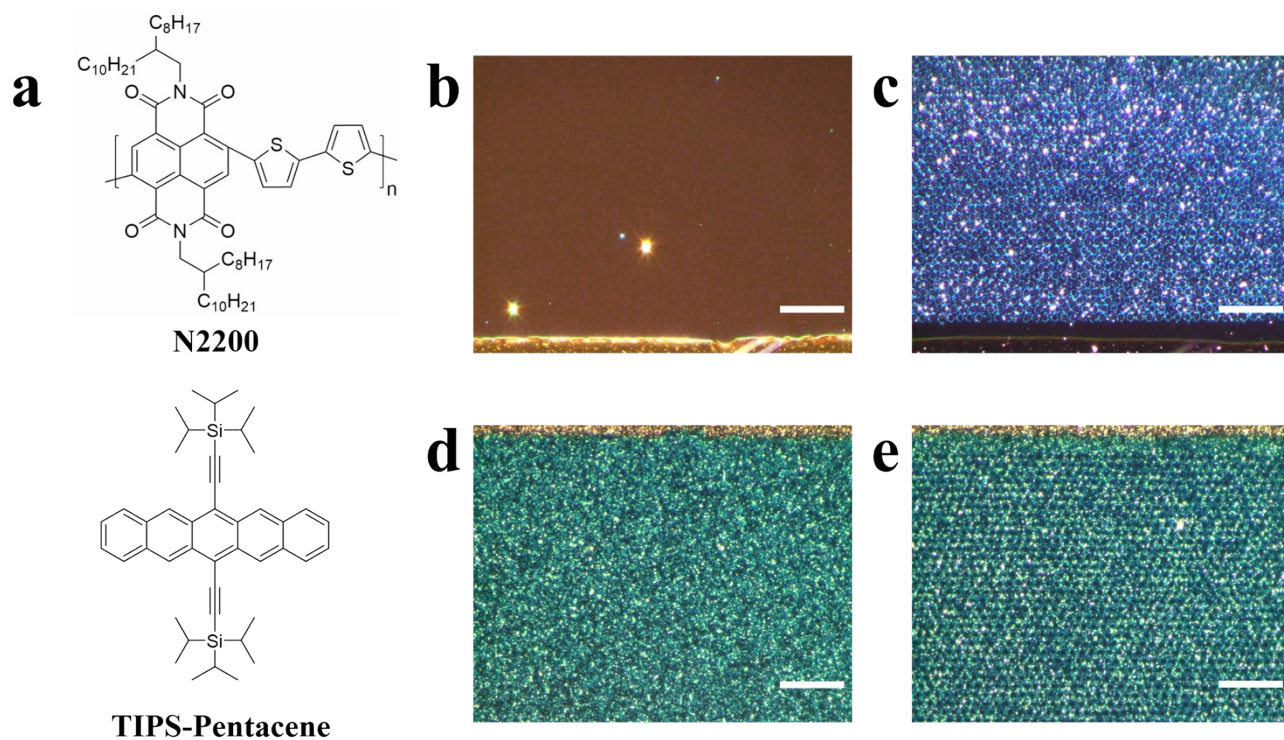

**Fig. S6.** (a) Chemical structures of N2200 and TIPS-Pentacene. (b-e) Optical images of pristine and patterned films of (b,c) N2200 and (d,e) TIPS-Pentacene materials. The scale bar is 10  $\mu\text{m}$ .



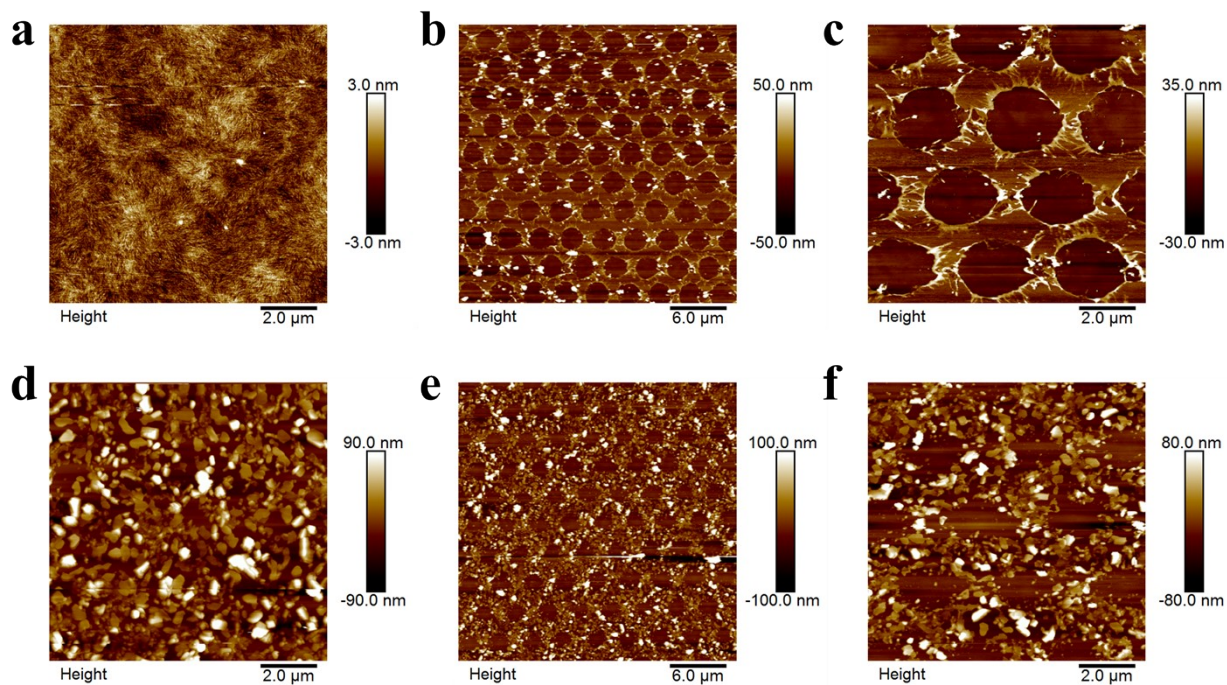

**Fig. S7.** (a-c) AFM height images of (a) pristine and (b,c) patterned N2200 films. (d-f) AFM height images of (d) pristine and (e,f) patterned TIPS-Pentacene films.

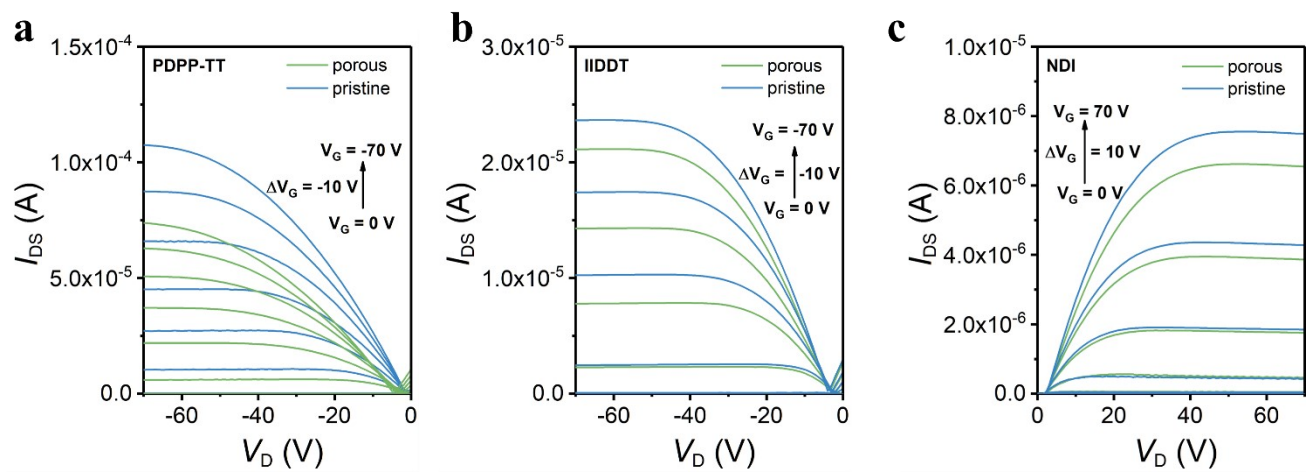

**Fig. S8.** Output characterization. OFET output curves for (a) PDPP-TT, (b) IIDDT and (c) NDI based devices.

**Supplementary Note 1.** The mobility calculation for OFET device with pristine and patterned OSC film.

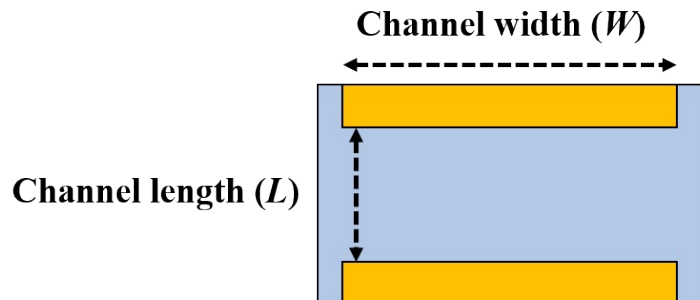

$$\mu = \frac{2L}{WC_i} \left( \frac{\partial (\sqrt{|I_D|})}{\partial V_G} \right)^2$$

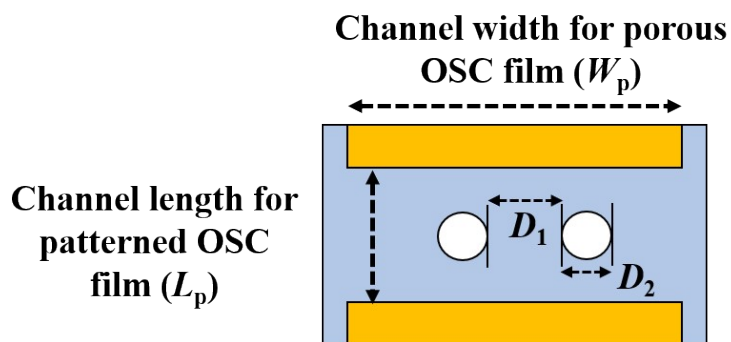

$$\mu_P = \frac{2L_P}{W_P C_i} \left( \frac{\partial (\sqrt{|I_D|})}{\partial V_G} \right)^2$$

$$W_P = \frac{D_1}{D_2} W$$

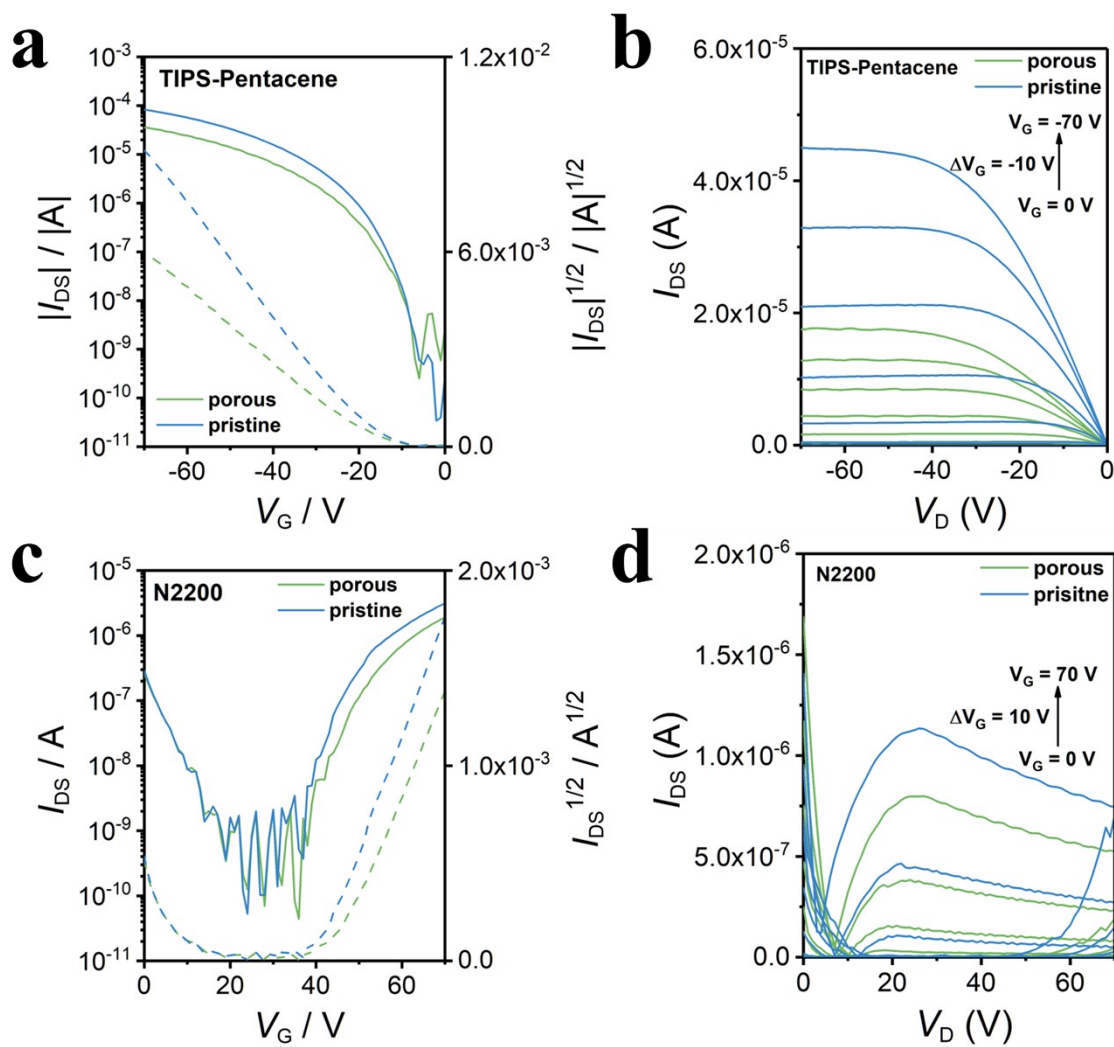

**Fig. S9.** Transfer and output curves of pristine and patterned films of (a,b) TIPS-Pentacene and (c,d) N2200.

**Table S1.** The estimated  $D_1$ ,  $D_2$ , carrier mobility ( $\mu$ ), threshold voltage ( $V_{th}$ ) and  $I_{on}/I_{off}$  values of the pristine and patterned TIPS-Pentacene and N2200 devices.

|                 | <b>Material</b> | $D_1$ ( $\mu\text{m}$ ) | $D_2$ ( $\mu\text{m}$ ) | $\mu^a$ ( $\text{cm}^2\text{V}^{-1}\text{s}^{-1}$ ) | $V_{th}$ (V) | $I_{on}/I_{off}$ |
|-----------------|-----------------|-------------------------|-------------------------|-----------------------------------------------------|--------------|------------------|
| <b>Pristine</b> | TIPS-Pentacene  | -                       | -                       | $0.34 \pm 0.010$                                    | -16.9        | $10^6$           |
|                 | N2200           | -                       | -                       | $0.085 \pm 0.002$                                   | 40.4         | $10^5$           |
| <b>Porous</b>   | TIPS-Pentacene  | $1.149 \pm 0.076$       | $2.443 \pm 0.113$       | $0.32 \pm 0.008$                                    | -17.5        | $10^5$           |
|                 | N2200           | $1.027 \pm 0.060$       | $2.637 \pm 0.056$       | $0.079 \pm 0.002$                                   | 45.1         | $10^5$           |

<sup>a</sup>The effective mobilities were extracted from transfer curves measured from eight individual devices.

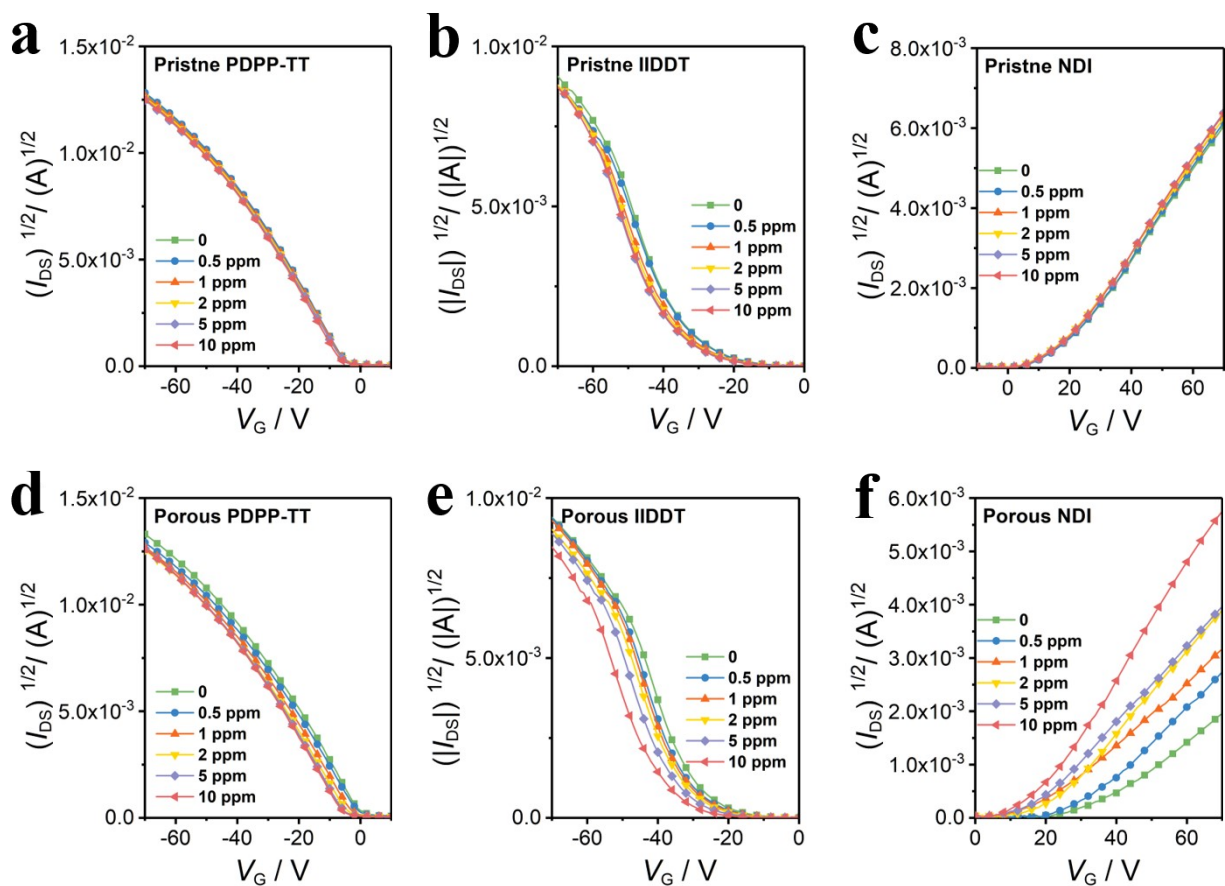

**Fig. S10.** Square root of drain current versus gate voltage plots at indicated NH<sub>3</sub> concentrations for (a,d) PDPP-TT, (b,e) IIDDT and (c,f) NDI based devices.

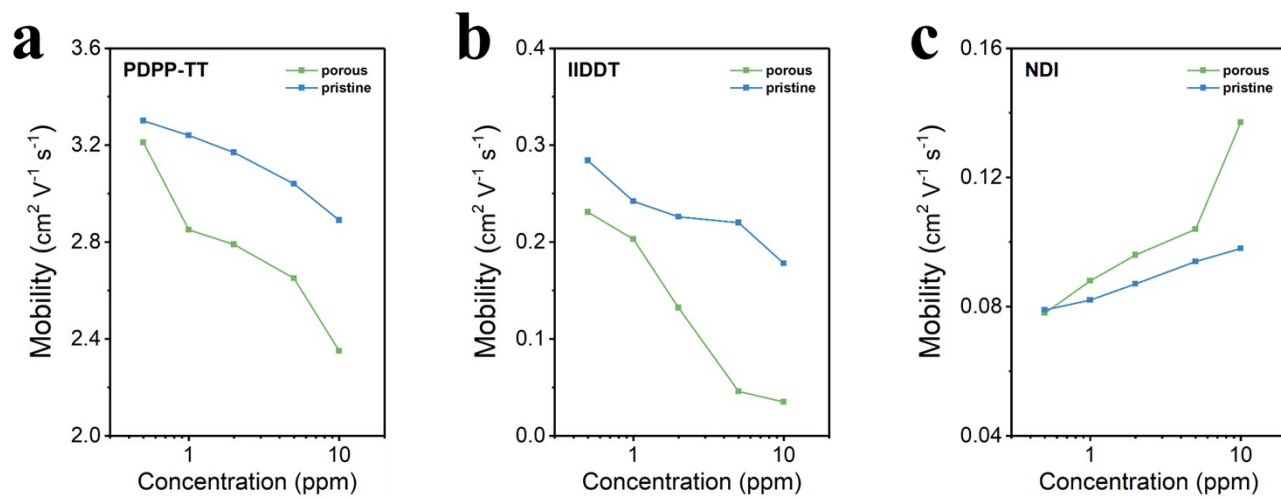

**Fig. S11.** Extracted mobility values of gas sensor devices as a function of  $\text{NH}_3$  concentrations for (a) PDPP-TT, (b) IIDDT and (c) NDI materials.

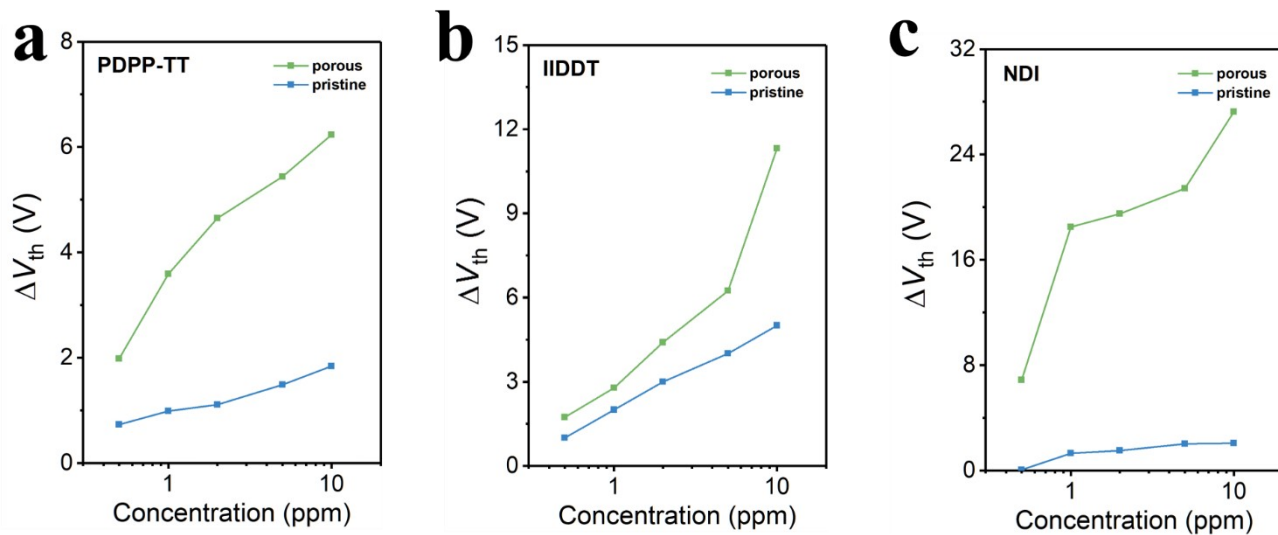

**Fig. S12.** Threshold voltage variations at indicated  $\text{NH}_3$  concentrations for (a) PDPP-TT, (b) IIDDT and (c) NDI based devices.



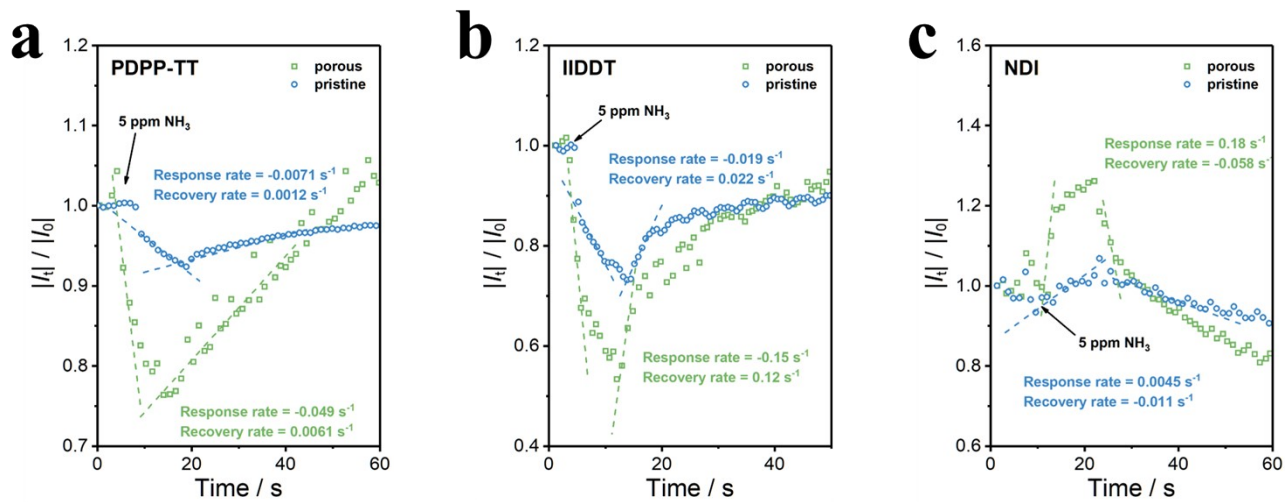

**Fig. S13.** Response and recovery rates for (a) PDPP-TT, (b) IIDDT, and (c) NDI based OFET gas sensors when exposed to 5 ppm  $NH_3$ .

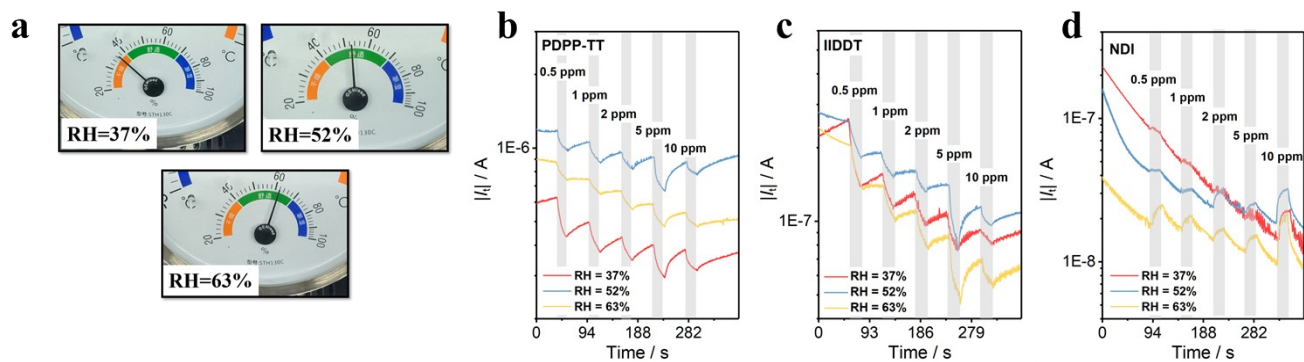

**Fig. S14.** (a) Photos of hygrometer with different relative humidity (RH) readings. The gas response of patterned OSC based OFET device was tested in different conditions with the RH of 37%, 52%, and 63%. (b-d) Drain current upon exposure to  $\text{NH}_3$  of indicated concentration under various RH conditions for (b) PDPP-TT, (c) IIDDT and (d) NDI based devices.

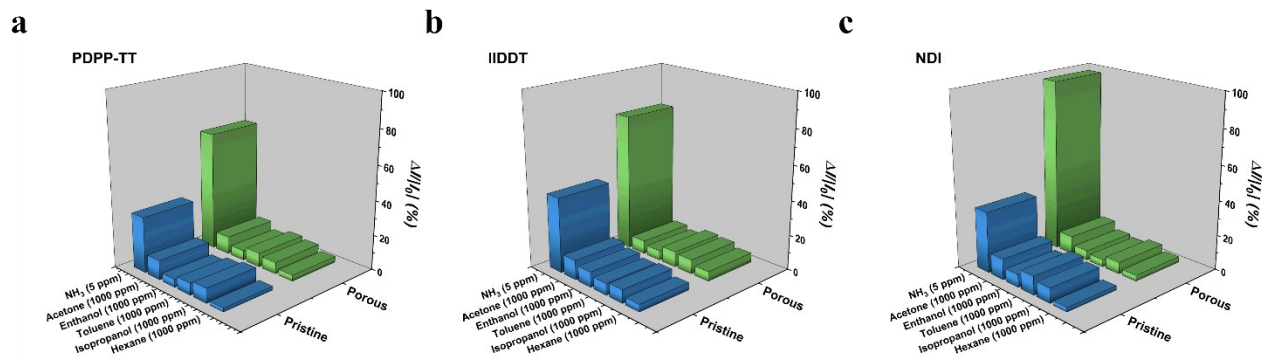

**Fig. S15.** Gas sensing sensitivities toward various gaseous analytes for (a) PDPP-TT, (b) IIDDT, and (c) NDI based devices. The concentration of gas analyte is 5 ppm, 1000 ppm, 1000 ppm, 1000 ppm, and 1000 ppm for NH<sub>3</sub>, acetone, ethanol, toluene, isopropanol, and hexane, respectively.
